# Supplementary material for: Environmental Risk Assessment of Silver Nanoparticles in Aquatic Ecosystems Using Fuzzy Logic
Source: MDPI journal article supplement (doi:10.3390/w14121885), 2022-06-11
Supplement: s1 [file s1]

Archive with 1 entries (1 files):
- water-1728118-supplementary.pdf
